# Supplementary material
Source: publisher figshare collection journal article supplement (https://tandf.figshare.com/articles/dataset/_/24219128)

## Results analyze of genetic structuring with sNMF (Frichot et al., 2014)

Frichot, E., Mathieu, F., Trouillon, T., Bouchard, G., François, O., 2014. Fast and Efficient Estimation of Individual Ancestry Coefficients. *Genetics* 196, 973–983. <https://doi.org/10.1534/genetics.113.160572>

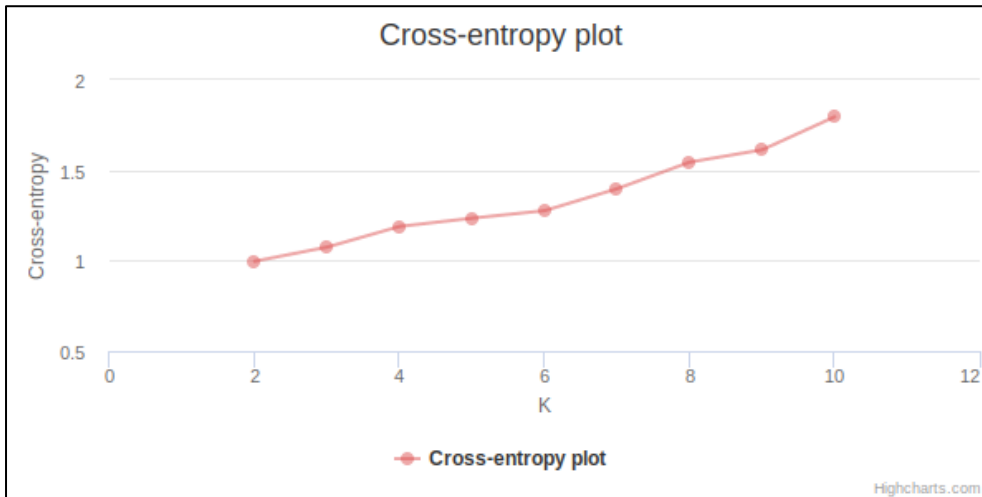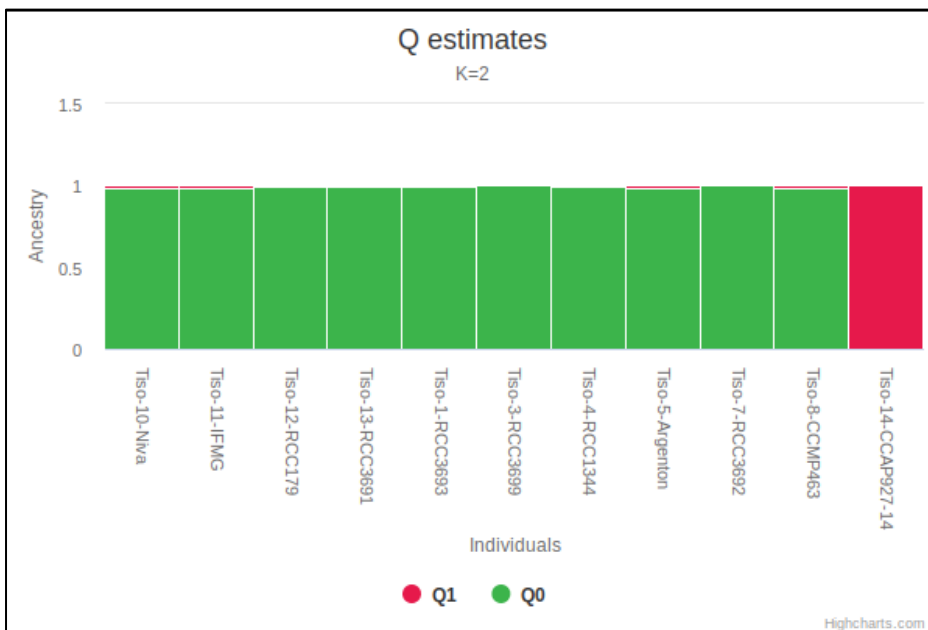

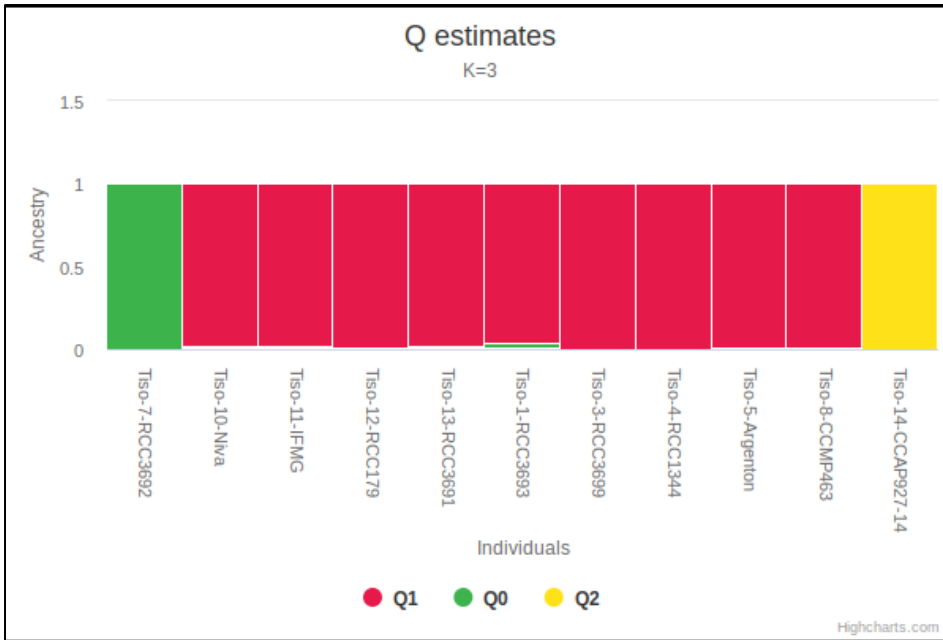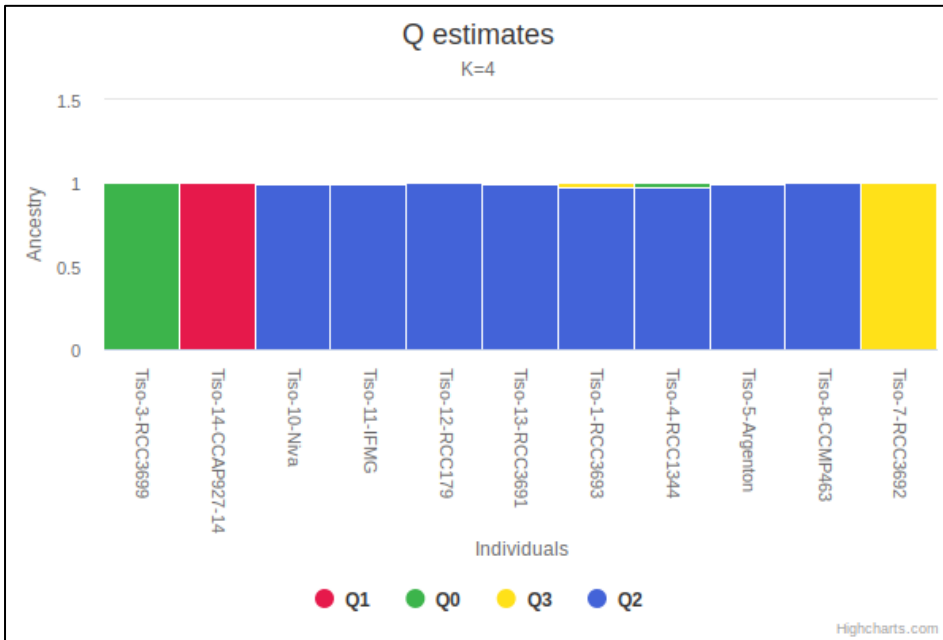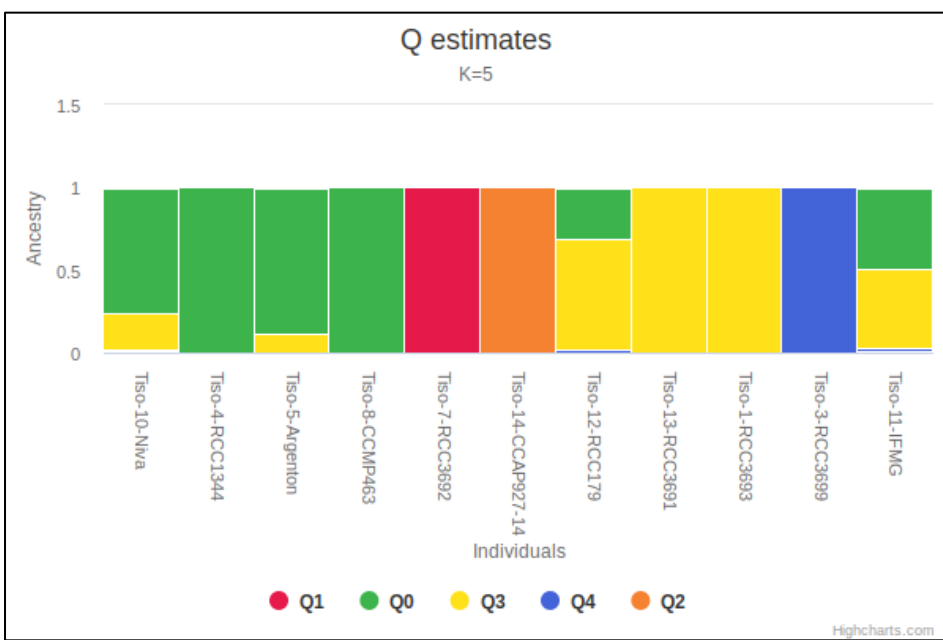

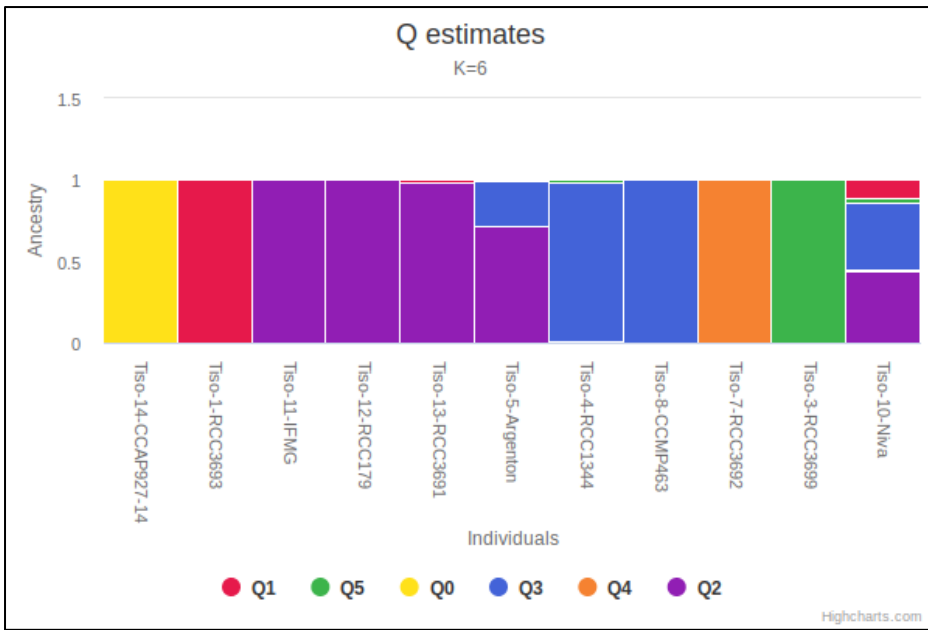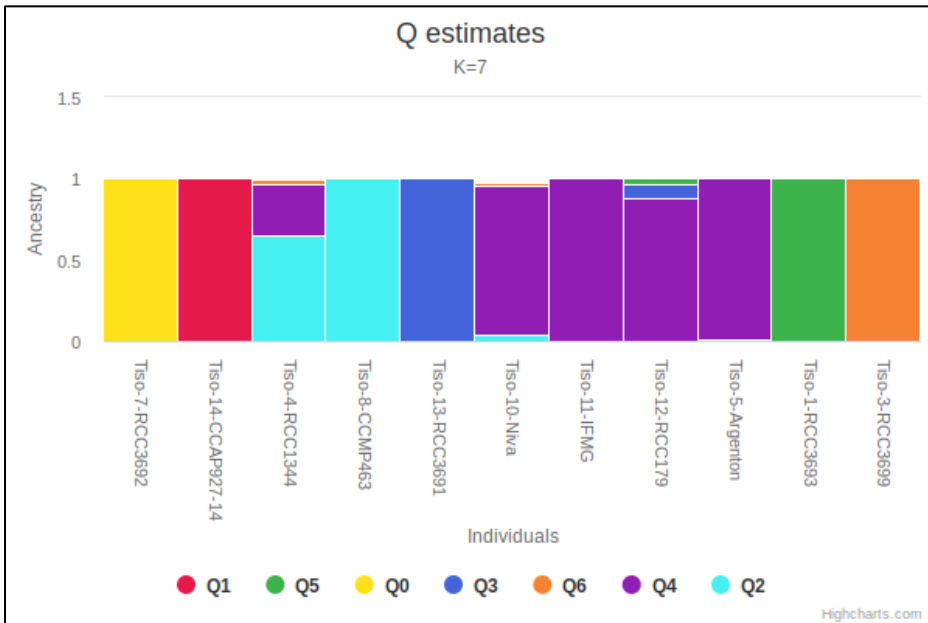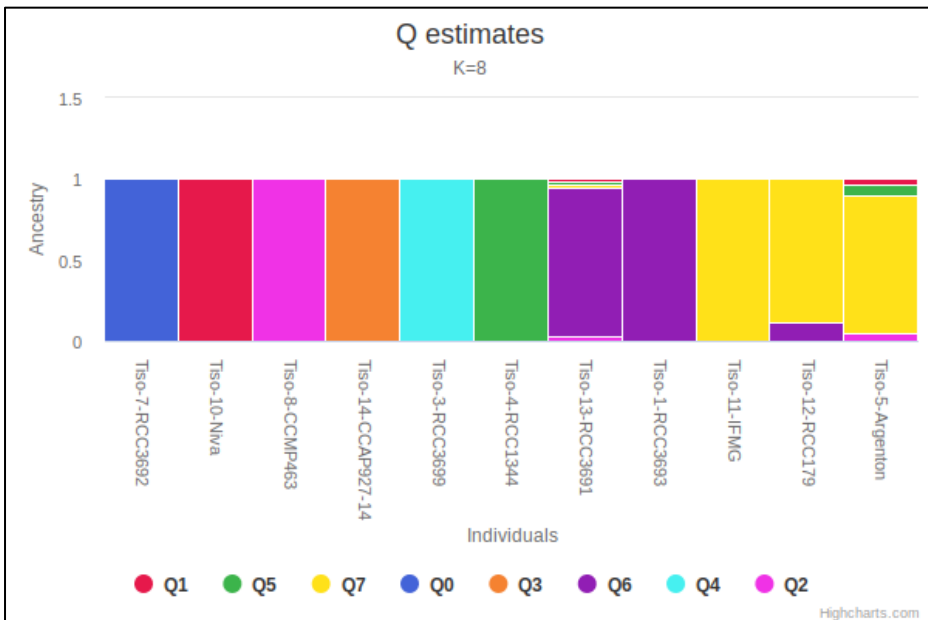

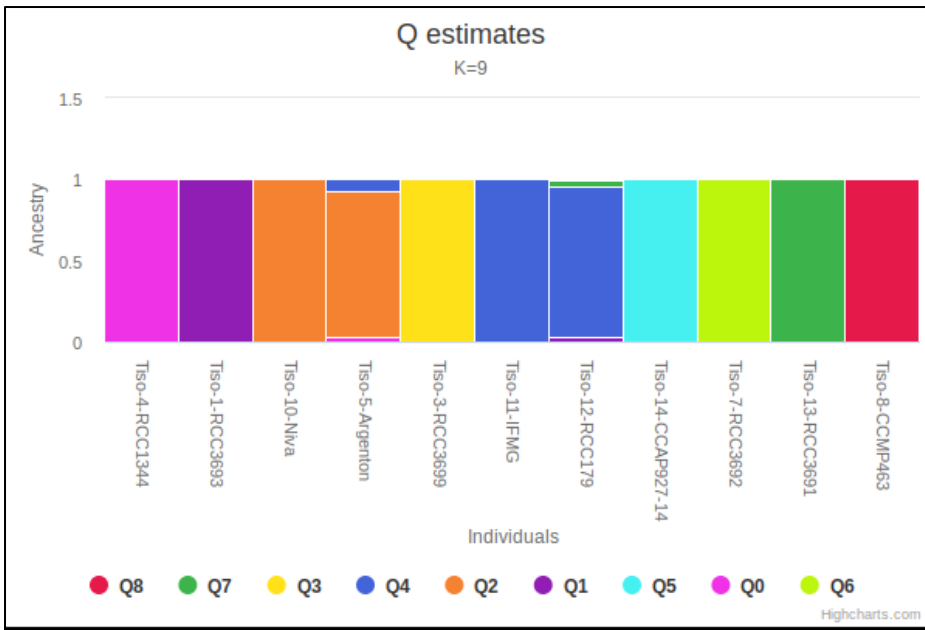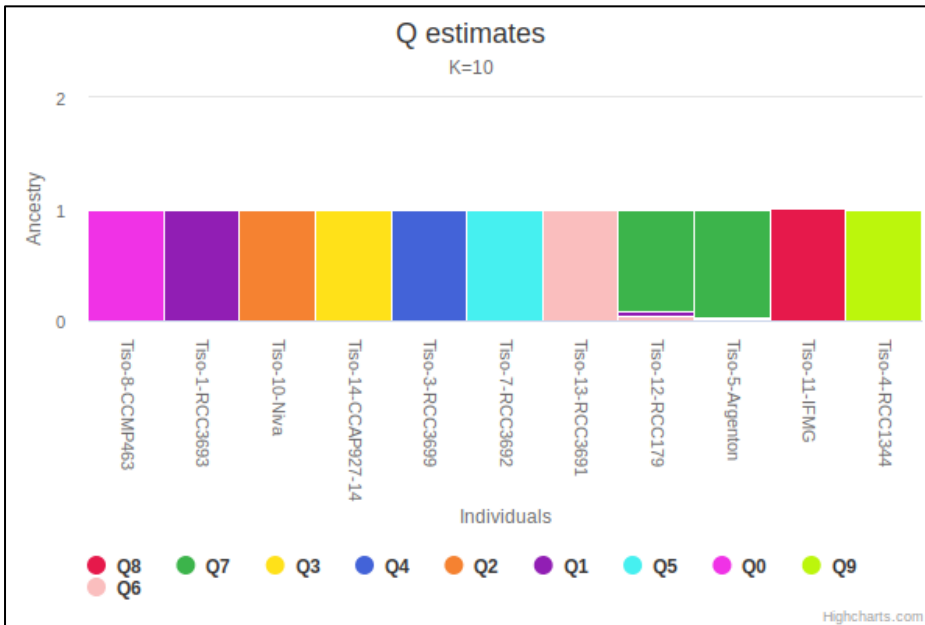

Supplement: Supplementary file 1 [file 1]
