# Supplementary material
Source: publisher figshare collection journal article supplement (https://tandf.figshare.com/articles/dataset/_/24219128)
Supplement: Supplementary file 2 [file 1]

# Softwares and tools used in this study

## Build new reference genome: *Tisochrysis lutea* v3

### TrimGalore v0.6.2 performs filtration of short reads.

<https://github.com/FelixKrueger/TrimGalore>

```
trim_galore --suppress_warn --no_report_file --dont_gzip --max_n 0 --stringency 9 --length 150 --output_dir  
OutputDir --quality 30 --paired RawRead_1 RawRead_2 --cores 8
```

### InstaGrall, improved genome assembling with HIC-seq data.

*briefly command used, see in github website for detail.*

### First step, hicstuff performs reference contact map from reference genome which will be improved.

<https://github.com/koszullab/hicstuff>

```
hicstuff pipeline -t CoresNumber -i -a bowtie2 -e DpnII -o Output-directory -g Reference-genome-v2.fasta HI-  
C_reads-1.fastq HI-C_reads-2.fastq
```

*note : Used with 24 cores*

*note : -i option is for iterative alignment*

*note : DpnII is restriction enzyme used*

### Second step, instagraal performs contact map, with 100 cycles.

<https://github.com/koszullab/instaGRAAL>

**Warning:** *require GPU to be used*

```
instagraal --save-matrix hicstuff_output-directory Reference-genome-v2.fasta Output-directory
```

### Third step, instagraal performs polishing of genome from results obtained previously.

```
instagraal-polish -m polishing -i info_fragments.txt -f Reference-genome-v2.fasta -o Output_polishing
```

*Note : info\_fragments.txt is the result of instagrall with 100 cycles of contact maps.*

*Note : Output\_polishing directory contained new reference-genome-v3.fasta*

# Anchor genome build

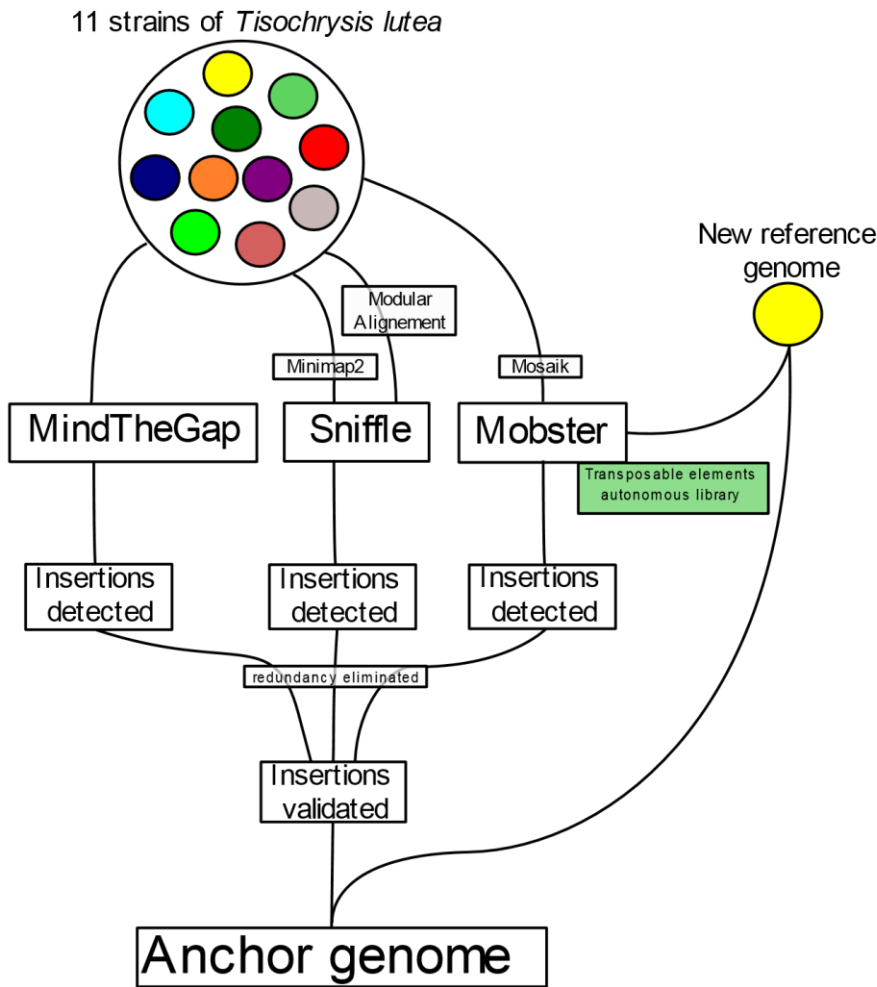

## Alignment softwares used

**BWA-MEM v0.7.17-r1188** perfoms alignment on genome from short read based in Burrows-Wheeler method.

```
bwa index Reference/anchor_genome.fasta
```

```
bwa mem Reference/anchor_genome.fasta Filter-Read-1.fastq Filter-Read-2.fastq -R "@RG\tID:$SampleName\tSM:$SampleName\tPL:ILLUMINA" -t CoresNumber >Output.sam
```

```
samtools view -b Output.sam >Output.bam  
samtools sort Output.bam > Output-sort.bam  
samtools index Output-sort.bam
```

*note : SampleName is for exemple the name of strain study*

*note : Used with 24 cores*

*note : Samtools performs conversion sam in bam file, sort and index bam file*

## MiniMAP2 v2.17 performs alignment on genome from long read.

### Index reference genome

```
minimap2 -x map-ont -d Reference_genome.mmi Reference/anchor_genome.fasta
```

### Alignment long reads on reference genome

```
minimap2 --MD -a -x map-ont -R "@RG\tID:$SampleName\tSM:$SampleName\tPL:MinION" -t $CoresNumber Reference_Genome.mmi Long-reads-filtered.fq> Output.sam
```

```
samtools view -b Output.sam >Output.bam  
samtools sort Output.bam > Output-sort.bam  
samtools index Output-sort.bam
```

*note : SampleName is for exemple the name of strain strudy*

*note : Used MinION option*

*note : Used with 24 cores*

*note : Samtools perform conversion sam in bam file, sort and index bam file*

## Mosaik v2.3 performs alignment on genome from short read based in Smith-Waterman method.

<https://github.com/wanpinglee/MOSAIK>

### Index reference genome

```
MosaikBuild fr Reference_genome.fasta -sn Reference-genome-Sample -oa Output-ReferenceGenome.dat
```

### Short reads index

```
MosaikBuild -q Short-Read1.fastq -q2 Short-Read2.fastq -st $SequencingMethod -mfl 400 -id SampleName -sam SampleName -out Index-Reads.dat
```

### Alignment

```
MosaikAligner -ia ReferenceGenome.dat -in Index-Reads.dat -out Output.bam -a multi -mhp 0 -p CoresNumber -ls 200 -m all -zn -quiet -hs 15 -annpe 2.1.78.pe.ann -annse 2.1.78.se.ann
```

```
samtools sort Output.bam > Output-sort.bam  
samtools index Output-sort.bam
```

*note : SampleName is for exemple the name of strain strudy*

*note : Used with 24 cores*

*note : Samtools perform conversion sam in bam file, sort and index bam file*

## The Modular Aligner v1.1.1 performs alignment on genome from long read based in Smith-Waterman method.

### Index reference genome

```
maCMD -X ReferenceGenome.fasta DirectoryReferenceGenome NameReferenceGenome
```

### Alignement

```
maCMD p Nanopore -i Long-reads-filtered.fq -x NameReferenceGenome.json -t $CoresNumber -o Ouput.sam --Emulate_NGMLR's_tag_output true
```

```
samtools view -b Output.sam >Output.bam  
samtools sort Output.bam > Output-sort.bam  
samtools index Output-sort.bam
```

*note : Used with 24 cores*

*note : Samtools perform conversion sam in bam file, sort and index bam file*

## Anchor genome, large insertions identification

### Porechop v0.2.4 deletes adapters of long reads.

<https://github.com/rrwick/Porechop>

```
porechop -i Raw-long-reads.fastq -o Output_reads.fastq --adaptater_threshold 95 --middle_threshold 90 --end_threshold 85
```

### Nanofilt v2.6.0 performs filtration of long reads.

<https://github.com/wdecoster/nanofilty>

```
NanoFilt Raw-long-reads.fastq --quality 8 --length 2000 > Filtered-long-reads.fastq
```

### Sniffles v1.0.11 performs large insertions detection from long read sequenced.

<https://github.com/fritzsedlazeck/Sniffles>

```
sniffles -m Aligement-File.bam -v Output.vcf --min_support 10 --threads CoresNumber --min_length 1000 --minmapping_qual 25 --report_seq
```

*note : min support option is number of minimal reads to consider a large insertion*

*note : Aligement-File.bam provide of long reads map with Minimap2 or Modular Aligner*

*note : Used with 8 cores*

### Mind The Gap v2.2 performs detection and assembly larges insertion variants from directly short reads sequenced.

<https://github.com/GATB/MindTheGap>

```
MindTheGap find -in Short-Read-1.fastq, Short-Read-2.fastq -ref Reference-Genome-v3.fasta -out Output-Directory -nb-cores CoresNumber -max-memory RamMemory
```

```
MindTheGap fill -graph Output-Graph.h5 -bkpt Output.breakpoints -out Output.vcf -nb-cores CoresNumber -max-memory RamMemory -max-length 20000 -max-nodes 300
```

*note : Used with 8 cores*

*note : Used with 10 gigaoctet in RAM*

### Mobster v0.2.4.1 performs detection of transposable elements known.

<https://github.com/jyhehir/mobster>

```
java -Xmx48G -jar -jar MobileInsertions-0.2.4.jar -properties OptionsMobster.conf -in Aligement-File.bam -out Output-MobsterPrediction.txt -sn SampleName
```

```
java -jar MobsterVCF.jar -file Output-MobsterPrediction.txt -out $ Output-Mobster.vcf
```

*note : The configuration file contained link from transposable elements in fasta format ; Read length is fixed at 150 bases and minimum supporting read is fixed at 10.*

### VCFLib v1.0.2 performs consensus genome from VCF file and genome in fasta.

<https://github.com/vcflib/vcflib>

```
vcf2fasta -f Tiso_Reference_Genome_V3.0.fasta -P InsertionVariants.vcf > Tiso_Anchor_Genome.fasta
```

*Note : InsertionVariant.vcf is split by contigs*

# Polymorphism identification into pan-genomes

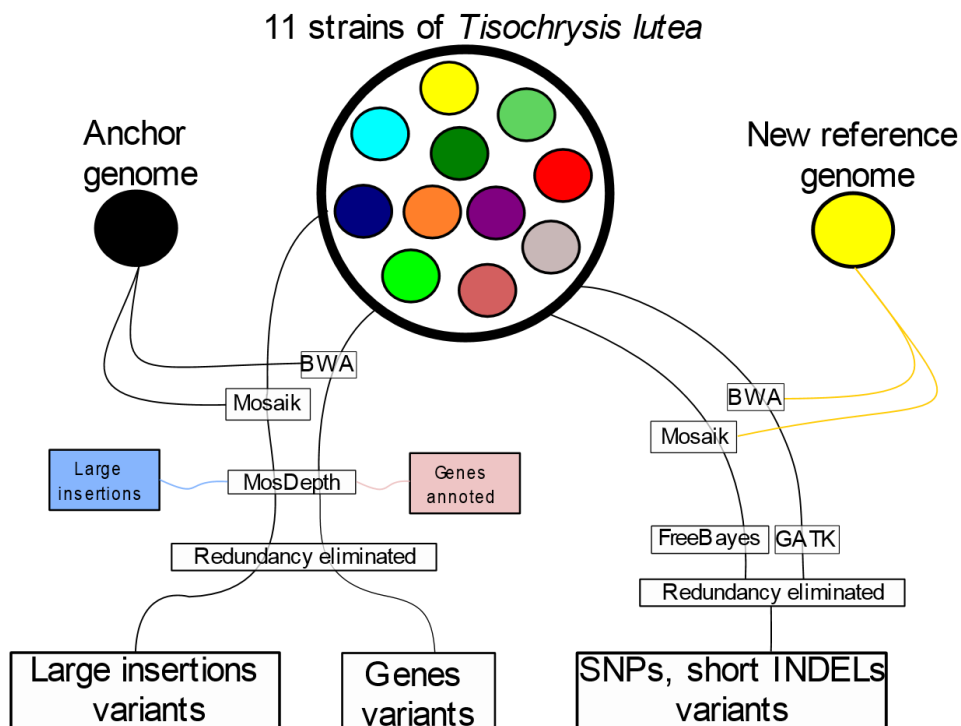

**Freebayes v1.3.1 performs detection of small polymorphisms SNPs (single-nucleotide polymorphisms), indels (insertions and deletions).**

<https://github.com/freebayes/freebayes>

```
freebayes -L All-Alignment-Files.bam -f Reference-Genome-v3.fasta -v OutputSortie.vcf --min-mapping-quality 20 --min-base-quality 30 --min-alternate-fraction 0.10 --min-alternate-count 5 --min-coverage 40
```

*note : used in same time with all alignment files from each strains*

**GATK v4.1.3.0 performs detection of small polymorphisms.**

<https://gatk.broadinstitute.org/hc/en-us>

*Index reference genome*

```
java -jar gatk-package-4.1.3.0-local.jar CreateSequenceDictionary --REFERENCE Reference-Genome-v3.fasta
```

*Calling polymorphism*

```
java -jar gatk-package-4.1.3.0-local.jar HaplotypeCaller --output Output.vcf --minimum-mapping-quality 20 --min-base-quality-score 30 --reference Reference-Genome-v3.fasta --max-alternate-alleles 2 --input All-Alignment-Files.bam
```

*note : used in same time with all alignment files from each strains*

**Mosdepth v0.2.9 performs depth calculation from bam file.**

<https://github.com/bentp/mosdepth>

```
mosdepth Output-PREFIX File.bam --by BedFile --thresholds 1 --threads 8
```

*note : BedFile is annotation of transposable elements or genes annotation in anchor genome*
